# Supplementary material for: Polymer-assisted drug sequestration from plasma protein by a surfactant with curtailed denaturing capacity
Source: Royal Society of Chemistry journal article supplement (doi:10.1039/c8cp03576h), 2019-01-01
Supplement: c8cp03576h1.pdf [file c8cp03576h1.pdf]

## Supporting Information

### Polymer assisted drug sequestration from plasma protein by surfactant with curtailed denaturing capacity

Aruna K. Mora, Arghyadeep Basu, Rahul Kalel, and Sukhendu Nath

#### Derivation of equations 3 & 6

Binding of a ligand (L) with protein (P) can be represented by following equation.

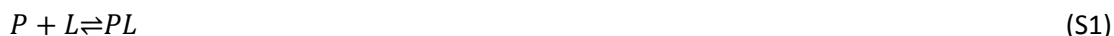

The dissociation constant ( $K_d$ ) for complex PL is defined as

$$K_d = \frac{[L][P]}{[PL]} \quad (S2)$$

where [L], [P] and [PL] are concentrations of free ligand, free protein and protein-ligand complex. If the total concentration of the ligand is  $[L]_0$ , then the concentration of protein bound ligand,  $[L]_b$ , is given by

$$[L]_b = [L]_0 - [L] \quad (S3)$$

Further, if the number of equivalent binding sites in protein for ligand L is n, then  $[L]_b$  and [PL] are related by following equation.

$$[L]_b = n [PL] \quad (S4)$$

Substituting the value of [PL] from eq. S2

$$[L]_b = n \frac{[L][P]_0}{K_d + [L]} \quad (S5)$$

where  $[P]_0$  is total concentration of protein.

Substituting the value of [L] from eq. S3 into eq. S5

$$[L]_b^2 - [L]_b(n[P]_0 + K_d + [L]_0) + n[P]_0[L]_0 = 0 \quad (S6)$$

The solution of  $[L]_b$  is given by

$$[L]_b = \frac{b - \sqrt{b^2 - 4c}}{2} \quad (S7)$$

where b and c are given by

$$b = n[P]_0 + K_d + [L]_0 \quad (S8)$$

$$c = n[P]_0[L]_0 \quad (S9)$$

*Estimation of  $K_d$  by absorption measurements:* The total absorbance ( $A_\lambda$ ) at wavelength  $\lambda$  is given by

$$A_\lambda = \epsilon[L] + \epsilon_b[L]_b \quad (S10)$$

Where  $\epsilon$  and  $\epsilon_b$  are the molar extinction coefficient of free and protein bound ligands. It is assumed that there is no absorption at wavelength  $\lambda$  due to protein and the optical path is 1 cm. Substituting the value of  $[L]$  and  $[L]_b$  from eq. S3 and S7, respectively in eq. S10.

$$A_\lambda = \epsilon[L]_0 + (\epsilon_b - \epsilon) \frac{b - \sqrt{b^2 - 4c}}{2} \quad (\text{S11})$$

Thus, for estimation of  $K_d$ , total absorbance,  $A_\lambda$ , are measured for ligand in presence of different concentrations of protein,  $[P]_0$ . The non-linear fitting of the experimental data by eq. S11 results the value of  $K_d$ ,  $n$  and  $\epsilon_b$ .

*Estimation of  $K_d$  by emission measurements:* Total emission intensity at wavelength  $\lambda$  ( $I_\lambda$ ) is given by

$$I_\lambda = F[L] + F_b[L]_b \quad (\text{S12})$$

where  $F$  and  $F_b$  are the molar fluorescence intensity at  $\lambda$  for free and protein bound ligand. The emission from protein at  $\lambda$  is neglected. The value of  $F$  can be calculated by measuring emission intensity at  $\lambda$  for known concentration of free ligand in aqueous solution. Substituting the value of  $[L]$  and  $[L]_b$  from eq. S3 and S7, respectively in eq. S12.

$$I_\lambda = F[L]_0 + (F_b - F) \frac{b - \sqrt{b^2 - 4c}}{2} \quad (\text{S13})$$

Thus, variation of  $I_\lambda$ , with  $[P]_0$  are fitted with eq. S13 to get values of  $K_d$ ,  $n$  and  $F_b$ .

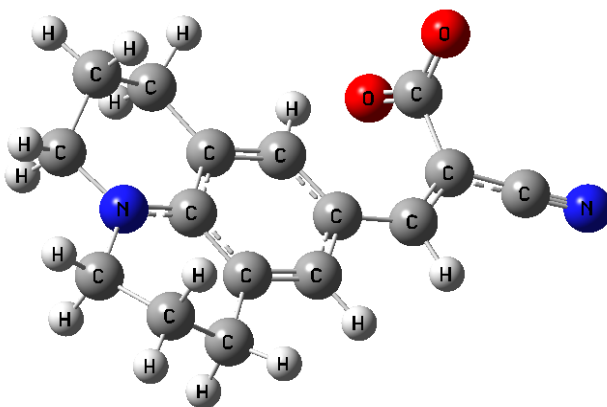

**Figure S1**-Optimized geometry of CCVJ in water obtained from quantum chemical calculations.

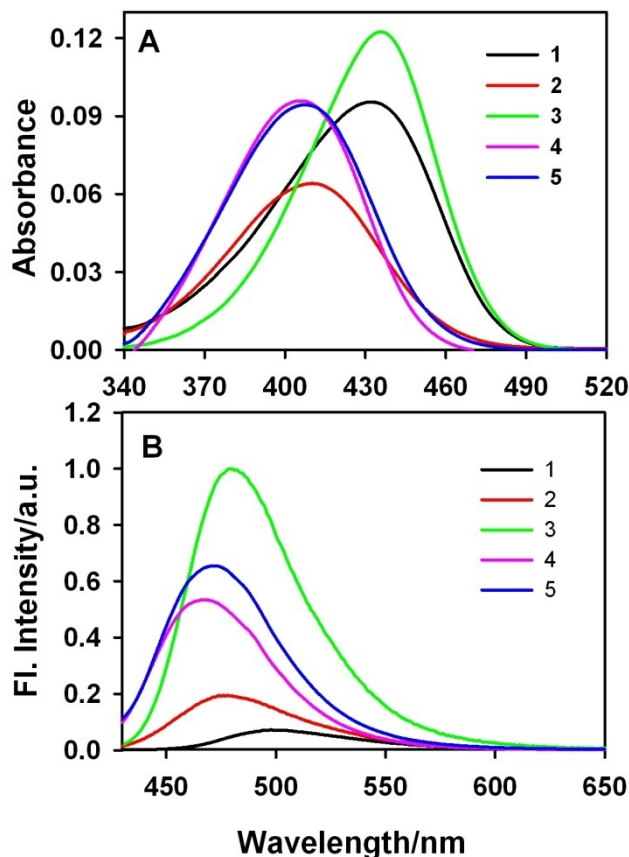

**Figure S2-** (A) Absorption and (B) emission spectra of 3.6  $\mu\text{M}$  CCVJ in (1) water, (2) 0.6 mM CTAB, (3) 1% P123, (4) 1% P123+ 0.6 mM CTAB and (5) BSA + 1% P123 +0.6 mM CTAB.

**Deconvolution of emission spectrum:** Following equation is used to deconvolute the emission spectra ( $I(\lambda)$ ) of CCVJ in BSA-P123-CCVJ systems.

$$I(\lambda) = A_{\text{BSA}} I^{\text{BSA}}(\lambda) + A_{\text{P123-CTAB}} I^{\text{P123-CTAB}}(\lambda) \quad (\text{S14})$$

where  $I^{\text{BSA}}(\lambda)$  and  $I^{\text{P123-CCVJ}}(\lambda)$  represent the emission spectra of 3.6  $\mu\text{M}$  CCVJ in BSA solution and in 1%P123-0.6 mM CTAB solution and parameters,  $A_{\text{BSA}}$  and  $A_{\text{P123-CCVJ}}$  are their respective contribution towards the total emission spectrum,  $I(\lambda)$ .  $I^{\text{BSA}}(\lambda)$  and  $I^{\text{P123-CCVJ}}(\lambda)$  have been determined independently. All emission spectra of CCVJ in BSA-P123-CTAB solutions were fitted by eq. S14 using non-linear least square fitting method to get the values of  $A_{\text{BSA}}$  and  $A_{\text{P123-CCVJ}}$ .

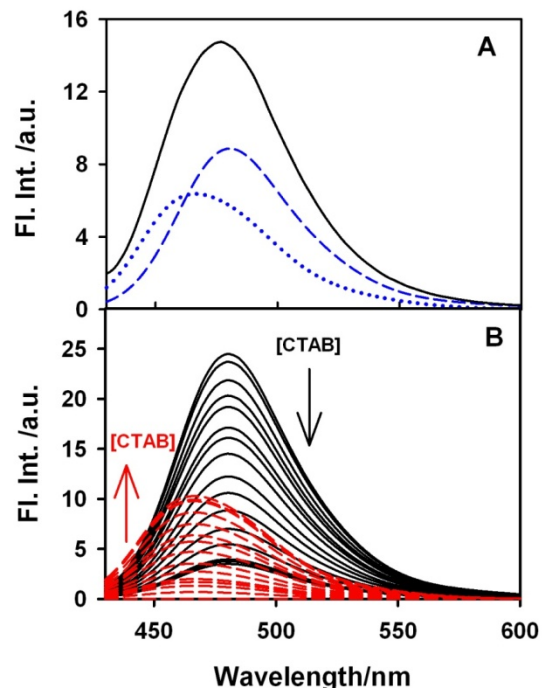

Figure S3- (A) Deconvolution of emission spectra of CCVJ in BSA-P123 solution with 0.25 mM CTAB. The solid line is experimentally measured emission spectrum of CCVJ ( $I(\lambda)$ ). The dashed and dotted spectra represent the emission spectra of CCVJ in BSA ( $I^{BSA}(\lambda)$ ) and in P123-CTAB supramolecular assemblies ( $I^{P123-CCVJ}(\lambda)$ ), respectively obtained by spectral deconvolution process. (B) The deconvoluted emission spectra of CCVJ in BSA (solid line) and in P123-CTAB supramolecular assemblies (dashed curves) in the presence of different concentrations of CTAB.

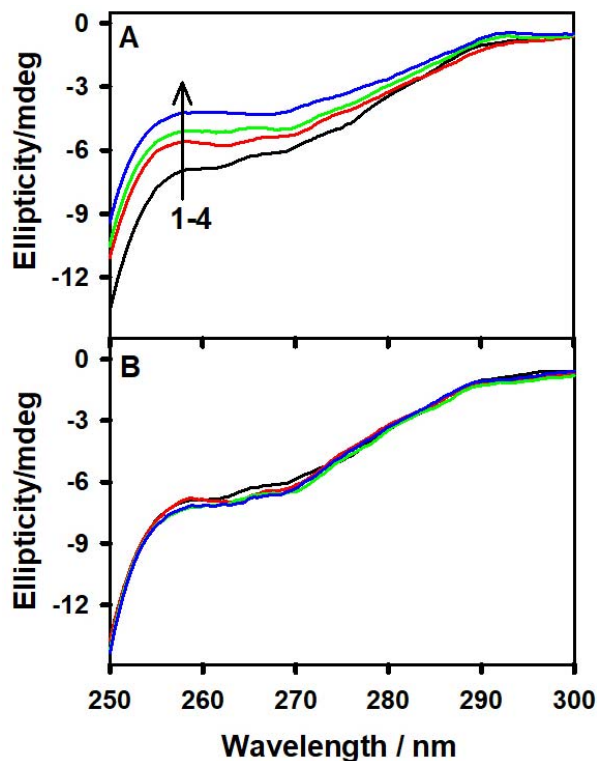

Figure S4: Near-UV CD spectra of BSA in (A) water and (B) 1% P123 solutions in presence of different concentrations of CTAB (1-4: 0, 0.2, 0.4 and 0.75 mM).
